# Supplementary material for: Assessment of Ameliorative Effect of Myrica esculenta in a DSS-Induced Murine Model against Ulcerative Colitis
Source: Hindawi journal article supplement (doi:10.1155/2024/6616549), 2024-03-21
Supplement: f1 [file 6616549.f1.docx]

**Supplementary Table 1: Preliminary phytochemical screenings of ethanolic extract of *M. esculenta* stem bark**

| **Phytochemical** | **Name of test** | **Ethanolic extract** |
| --- | --- | --- |
| **Alkaloids** | Mayer’s test  Wagner test | +  + |
| **Carbohydrates** | Fehling’s test  Bourntrager | +  + |
| **Flavanoids** | Lead acetate test  Alkaline reagent test | +  + |
| **Tannins** | Gelatin test | + |
| **Resins** | FeCl3 test | + |
| **Saponin** | Foam test | - |
| **Phenolic compounds** | Ferric chloride test | + |
| **Triterpenoids** | Salkowski test | + |
| **Protein** | Biuret test  Ninhydrin | - |
| **Steroids** | Lievermann -burchard | + |

**(+ )present, (-) absent**
