# Supplementary material for: Assessment of Ameliorative Effect of Myrica esculenta in a DSS-Induced Murine Model against Ulcerative Colitis
Source: Hindawi journal article supplement (doi:10.1155/2024/6616549), 2024-03-21
Supplement: f2 [file 6616549.f2.docx]

**Supplementary Table 2: Result of physiochemical analysis of ethanolic extract *M. esculenta* stem bark**

| **Physiochemical parameters** | | **Average Value** |
| --- | --- | --- |
| Moisture content (%w/w) | | **0.6±0.04** |
| Loss on Drying (LOD) (%w/w) | | **8.2±0.37** |
| **Ash Value** (%w/w) | Total Ash | **4.3±0.29** |
| Acid insoluble | **2.8±0.25** |
| **Extractive value (Ethanol)** (%w/w) | | **26.7±0.84** |
| **Water soluble extractive** (%w/w) | | **12.6±0.19** |

All values are expressed as mean + SEM (n=3)
